# Supplementary material for: Non-random host tree infestation by the Neotropical liana Marcgravia longifolia
Source: PeerJ journal article supplement (doi:10.7717/peerj.14535), 2022-12-15
Supplement: Heymann_et_al_Supplementary_Table_2.pdf [file Heymann_et_al_Supplementary_Table_2.pdf]

**Supplementary Table 2.**

Estimated species specific infestation probabilities (inverse logit transformed estimated Best Linear Unbiased Predictors plus the intercept). CI: credible interval

| <b>Tree genus</b>     | <b>lowerCI99</b> | <b>lowerCI50</b> | <b>median</b> | <b>upperCI50</b> | <b>upperCI99</b> |
|-----------------------|------------------|------------------|---------------|------------------|------------------|
| <i>Abarema</i>        | 0.000001         | 0.000111         | 0.000310      | 0.001189         | 0.018174         |
| <i>Albizia</i>        | 0.000001         | 0.000110         | 0.000314      | 0.001226         | 0.019040         |
| <i>Anaueria</i>       | 0.000001         | 0.000120         | 0.000318      | 0.001360         | 0.021173         |
| <i>Aniba</i>          | 0.000001         | 0.000116         | 0.000310      | 0.001256         | 0.020191         |
| <i>Anthodiscus</i>    | 0.000001         | 0.000104         | 0.000305      | 0.001167         | 0.019709         |
| <i>Aptandra</i>       | 0.000001         | 0.000119         | 0.000275      | 0.001178         | 0.011150         |
| <i>Brosimum</i>       | 0.003162         | 0.009233         | 0.011908      | 0.016785         | 0.032892         |
| <i>Buchenavia</i>     | 0.000036         | 0.000675         | 0.001146      | 0.002732         | 0.010005         |
| <i>Byrsonima</i>      | 0.000001         | 0.000113         | 0.000315      | 0.001253         | 0.018161         |
| <i>Capparis</i>       | 0.000001         | 0.000101         | 0.000248      | 0.000914         | 0.008483         |
| <i>Cariniana</i>      | 0.000053         | 0.001072         | 0.001888      | 0.004960         | 0.020238         |
| <i>Chrysochlamys</i>  | 0.000001         | 0.000101         | 0.000291      | 0.001089         | 0.014662         |
| <i>Chrysophyllum</i>  | 0.000588         | 0.006248         | 0.010359      | 0.021750         | 0.071309         |
| <i>Composneura</i>    | 0.000001         | 0.000124         | 0.000312      | 0.001325         | 0.018514         |
| <i>Conceveiba</i>     | 0.000041         | 0.000812         | 0.001409      | 0.003613         | 0.014693         |
| <i>Couepia</i>        | 0.000001         | 0.000096         | 0.000237      | 0.000869         | 0.007841         |
| <i>Couma</i>          | 0.000001         | 0.000113         | 0.000317      | 0.001238         | 0.018254         |
| <i>Crematosperma</i>  | 0.000001         | 0.000127         | 0.000271      | 0.001282         | 0.011357         |
| <i>Crepidospermum</i> | 0.000001         | 0.000113         | 0.000312      | 0.001233         | 0.017090         |
| <i>Cybianthus</i>     | 0.000001         | 0.000128         | 0.000298      | 0.001289         | 0.014122         |
| <i>Dacryodes</i>      | 0.000002         | 0.000103         | 0.000263      | 0.000978         | 0.012406         |
| <i>Dendropanax</i>    | 0.000001         | 0.000117         | 0.000310      | 0.001285         | 0.018644         |
| <i>Dialium</i>        | 0.000067         | 0.001277         | 0.002516      | 0.006415         | 0.030026         |
| <i>Diclinanona</i>    | 0.000001         | 0.000093         | 0.000228      | 0.000827         | 0.006760         |
| <i>Duguetia</i>       | 0.000001         | 0.000112         | 0.000310      | 0.001217         | 0.016292         |
| <i>Duroia</i>         | 0.000001         | 0.000103         | 0.000268      | 0.000934         | 0.009623         |
| <i>Ecclinusa</i>      | 0.000001         | 0.000106         | 0.000248      | 0.000970         | 0.008504         |
| <i>Eschweilera</i>    | 0.003677         | 0.005149         | 0.005698      | 0.006429         | 0.008620         |
| <i>Ferdinandusa</i>   | 0.000001         | 0.000120         | 0.000289      | 0.001206         | 0.013572         |
| <i>Guarea</i>         | 0.000001         | 0.000074         | 0.000149      | 0.000537         | 0.003408         |
| <i>Guatteria</i>      | 0.000001         | 0.000108         | 0.000261      | 0.001060         | 0.009420         |
| <i>Heisteria</i>      | 0.000001         | 0.000107         | 0.000247      | 0.000981         | 0.008604         |
| <i>Helicostylis</i>   | 0.000056         | 0.000932         | 0.001854      | 0.004260         | 0.020230         |

|                      |          |          |          |          |          |
|----------------------|----------|----------|----------|----------|----------|
| <i>Hevea</i>         | 0.001579 | 0.006379 | 0.008843 | 0.013779 | 0.031855 |
| <i>Huberodendron</i> | 0.000001 | 0.000108 | 0.000311 | 0.001226 | 0.018053 |
| <i>Hymenaea</i>      | 0.004588 | 0.013097 | 0.016646 | 0.023930 | 0.047992 |
| <i>Inga</i>          | 0.000001 | 0.000087 | 0.000161 | 0.000633 | 0.003932 |
| <i>Iryanthera</i>    | 0.000020 | 0.000254 | 0.000402 | 0.000878 | 0.003024 |
| <i>Jacaranda</i>     | 0.000001 | 0.000112 | 0.000234 | 0.001004 | 0.007658 |
| <i>Ladenbergia</i>   | 0.000001 | 0.000095 | 0.000194 | 0.000762 | 0.005397 |
| <i>Leonia</i>        | 0.000001 | 0.000112 | 0.000254 | 0.001044 | 0.009699 |
| <i>Licania</i>       | 0.000263 | 0.000908 | 0.001198 | 0.001785 | 0.003952 |
| <i>Licaria</i>       | 0.000001 | 0.000091 | 0.000218 | 0.000792 | 0.006714 |
| <i>Mabea</i>         | 0.000059 | 0.001088 | 0.002082 | 0.005462 | 0.025961 |
| <i>Macrolobium</i>   | 0.000001 | 0.000112 | 0.000250 | 0.001050 | 0.010687 |
| <i>Manilkara</i>     | 0.000001 | 0.000114 | 0.000311 | 0.001247 | 0.018189 |
| <i>Maprounea</i>     | 0.000001 | 0.000134 | 0.000312 | 0.001425 | 0.015172 |
| <i>Matayba</i>       | 0.000001 | 0.000110 | 0.000272 | 0.001136 | 0.012347 |
| <i>Matisia</i>       | 0.000001 | 0.000096 | 0.000230 | 0.000859 | 0.007608 |
| <i>Memora</i>        | 0.000001 | 0.000121 | 0.000313 | 0.001265 | 0.016934 |
| <i>Mezilaurus</i>    | 0.000001 | 0.000111 | 0.000222 | 0.001015 | 0.006712 |
| <i>Miconia</i>       | 0.000001 | 0.000111 | 0.000298 | 0.001101 | 0.012923 |
| <i>Micrandra</i>     | 0.000001 | 0.000062 | 0.000115 | 0.000386 | 0.001768 |
| <i>Micropholis</i>   | 0.000001 | 0.000105 | 0.000223 | 0.000898 | 0.006827 |
| <i>Moronobea</i>     | 0.000001 | 0.000110 | 0.000296 | 0.001182 | 0.012756 |
| <i>Mouriri</i>       | 0.000001 | 0.000097 | 0.000266 | 0.000917 | 0.009284 |
| <i>Naucleopsis</i>   | 0.000001 | 0.000109 | 0.000258 | 0.001066 | 0.010106 |
| <i>Neea</i>          | 0.000001 | 0.000107 | 0.000225 | 0.000904 | 0.006999 |
| <i>Ocotea</i>        | 0.000001 | 0.000096 | 0.000187 | 0.000791 | 0.004921 |
| <i>Oenocarpus</i>    | 0.000001 | 0.000063 | 0.000118 | 0.000400 | 0.002143 |
| <i>Ophiocaryon</i>   | 0.000001 | 0.000090 | 0.000206 | 0.000737 | 0.006490 |
| <i>Parinari</i>      | 0.000001 | 0.000107 | 0.000318 | 0.001148 | 0.018906 |
| <i>Parkia</i>        | 0.000403 | 0.001965 | 0.002733 | 0.004571 | 0.010686 |
| <i>Persea</i>        | 0.000001 | 0.000122 | 0.000311 | 0.001359 | 0.017268 |
| <i>Pleurothyrium</i> | 0.000001 | 0.000105 | 0.000306 | 0.001136 | 0.017769 |
| <i>Pouroma</i>       | 0.000001 | 0.000079 | 0.000168 | 0.000573 | 0.003974 |
| <i>Pouteria</i>      | 0.002195 | 0.005845 | 0.007105 | 0.010008 | 0.018245 |
| <i>Protium</i>       | 0.000001 | 0.000061 | 0.000114 | 0.000383 | 0.001984 |
| <i>Pseudolmedia</i>  | 0.000001 | 0.000118 | 0.000314 | 0.001264 | 0.020207 |
| <i>Rhigospira</i>    | 0.000001 | 0.000108 | 0.000290 | 0.001115 | 0.013910 |
| <i>Rinorea</i>       | 0.000001 | 0.000117 | 0.000293 | 0.001188 | 0.013287 |
| <i>Sacoglottis</i>   | 0.000001 | 0.000117 | 0.000285 | 0.001205 | 0.014466 |

|                       |          |          |          |          |          |
|-----------------------|----------|----------|----------|----------|----------|
| <i>Simaba</i>         | 0.000001 | 0.000113 | 0.000259 | 0.001088 | 0.010720 |
| <i>Sloanea</i>        | 0.000240 | 0.001058 | 0.001509 | 0.002399 | 0.005624 |
| <i>Sterculia</i>      | 0.000001 | 0.000098 | 0.000295 | 0.000996 | 0.012498 |
| <i>Swartzia</i>       | 0.000001 | 0.000081 | 0.000193 | 0.000654 | 0.005189 |
| <i>Tachigali</i>      | 0.000001 | 0.000078 | 0.000148 | 0.000562 | 0.002920 |
| <i>Tapirira</i>       | 0.000001 | 0.000105 | 0.000260 | 0.001010 | 0.010663 |
| <i>Tetrastylidium</i> | 0.000001 | 0.000093 | 0.000213 | 0.000793 | 0.006303 |
| <i>Toulicia</i>       | 0.000001 | 0.000103 | 0.000237 | 0.000950 | 0.007526 |
| <i>Tovomita</i>       | 0.000001 | 0.000117 | 0.000263 | 0.001105 | 0.010317 |
| <i>Trichilia</i>      | 0.000048 | 0.000961 | 0.001654 | 0.004415 | 0.016940 |
| <i>Vantanea</i>       | 0.000001 | 0.000099 | 0.000198 | 0.000792 | 0.004959 |
| <i>Virola</i>         | 0.000040 | 0.000611 | 0.001082 | 0.002519 | 0.009848 |
| <i>Xylopia</i>        | 0.000001 | 0.000093 | 0.000246 | 0.000848 | 0.008620 |
| <i>Zygia</i>          | 0.000001 | 0.000075 | 0.000165 | 0.000563 | 0.003497 |
