# Supplementary material for: Non-random host tree infestation by the Neotropical liana Marcgravia longifolia
Source: PeerJ. 2022 Dec 15;10:e14535. doi: 10.7717/peerj.14535 (PMC9760024; doi:10.7717/peerj.14535)
Supplement: Supplemental Information 1 — The tree genera that host (in bold) or do not host Marcgravia longifolia. It provides the the number and percentage of tree individuals per genus, the number of infested individuals, and the percentage of the respective tree genus amongst all tree infested by Marcgravia longifolia. The last column includes the number of individuals per genus extrapolated from the survey area (2 ha) to the area over which Marcgravia longifolia is distributed in the EBQB study area (78.3 ha). [file peerj-10-14535-s001.xlsx]

## Sheet: Data
Supplementary Table 1. Dataset
Genera that host Marcgravia longifoliaare in bold
Host genus	Family	# individuals in inventory	% individuals in inventory	# of infested individuals	% of infested individuals	extrapolated # of individuals in area
Eschweilera	Lecythidaceae	161	15.8621	37	42.5287	6303.15
Licania	Chrysobalanaceae	72	7.0936	4	4.5977	2818.8
Protium	Burseraceae	49	4.82759	0	0	1918.35
Iryanthera	Myristicaceae	49	4.82759	1	1.14943	1918.35
Micrandra	Euphorbiaceae	49	4.82759	0	0	1918.35
Oenocarpus	Arecaceae	47	4.63054	0	0	1840.05
Sloanea	Elaeocarpaceae	39	3.84236	3	3.44828	1526.85
Tachigali	Fabaceae	27	2.6601	0	0	1057.05
Guarea	Meliaceae	26	2.56158	0	0	1017.9
Inga	Fabaceae	22	2.16749	0	0	861.3
Pouroma	Cecropiaceae	21	2.06897	0	0	822.15
Pouteria	Sapotaceae	21	2.06897	7	8.04598	822.15
Zygia	Fabaceae	21	2.06897	0	0	822.15
Parkia	Fabaceae	20	1.97044	3	3.44828	783
Ocotea	Lauraceae	15	1.47783	0	0	587.25
Ladenbergia	Rubiaceae	14	1.37931	0	0	548.1
Swartzia	Fabaceae	14	1.37931	0	0	548.1
Vantanea	Humiriaceae	13	1.28079	0	0	508.95
Virola	Myristicaceae	12	1.18227	1	1.14943	469.8
Ophiocaryon	Salicaceae	12	1.18227	0	0	469.8
Buchenavia	Combretaceae	11	1.08374	1	1.14943	430.65
Brosimum	Moraceae	10	0.985222	6	6.89655	391.5
Tetrastylidium	Olacaceae	10	0.985222	0	0	391.5
Licaria	Lauraceae	9	0.8867	0	0	352.35
Mezilaurus	Lauraceae	9	0.8867	0	0	352.35
Micropholis	Sapotaceae	9	0.8867	0	0	352.35
Neea	Nyctaginaceae	9	0.8867	0	0	352.35
Hevea	Euphorbiaceae	8	0.788177	4	4.5977	313.2
Conceveiba	Euphorbiaceae	8	0.788177	1	1.14943	313.2
Diclinanona	Annonaceae	8	0.788177	0	0	313.2
Jacaranda	Bignoniaceae	8	0.788177	0	0	313.2
Matisia	Bombacaceae	8	0.788177	0	0	313.2
Couepia	Chrysobalanaceae	7	0.689655	0	0	274.05
Hymenaea	Fabaceae	7	0.689655	6	6.89655	274.05
Toulicia	Sapindaceae	7	0.689655	0	0	274.05
Xylopia	Annonaceae	7	0.689655	0	0	274.05
Macrolobium	Fabaceae	6	0.591133	0	0	234.9
Capparis	Capparaceae	6	0.591133	0	0	234.9
Ecclinusa	Sapotaceae	6	0.591133	0	0	234.9
Heisteria	Olacaceae	6	0.591133	0	0	234.9
Leonia	Violaceae	6	0.591133	0	0	234.9
Trichilia	Meliaceae	6	0.591133	1	1.14943	234.9
Cariniana	Lecythidaceae	5	0.492611	1	1.14943	195.75
Dacryodes	Burseraceae	5	0.492611	0	0	195.75
Duroia	Rubiaceae	5	0.492611	0	0	195.75
Guatteria	Annonaceae	5	0.492611	0	0	195.75
Helicostylis	Moraceae	5	0.492611	1	1.14943	195.75
Mouriri	Melastomataceae	5	0.492611	0	0	195.75
Naucleopsis	Moraceae	5	0.492611	0	0	195.75
Simaba	Simaroubaceae	5	0.492611	0	0	195.75
Tapirira	Anacardiaceae	5	0.492611	0	0	195.75
Tovomita	Clusiaceae	5	0.492611	0	0	195.75
Aptandra	Olacaceae	4	0.394089	0	0	156.6
Crematosperma	Annonaceae	4	0.394089	0	0	156.6
Mabea	Euphorbiaceae	4	0.394089	1	1.14943	156.6
Matayba	Sapindaceae	4	0.394089	0	0	156.6
Chrysochlamys	Clusiaceae	3	0.295567	0	0	117.45
Cybianthus	Myrsinaceae	3	0.295567	0	0	117.45
Dialium	Fabaceae	3	0.295567	1	1.14943	117.45
Ferdinandusa	Rubiaceae	3	0.295567	0	0	117.45
Miconia	Melastomataceae	3	0.295567	0	0	117.45
Moronobea	Clusiaceae	3	0.295567	0	0	117.45
Rhigospira	Apocynaceae	3	0.295567	0	0	117.45
Rinorea	Violaceae	3	0.295567	0	0	117.45
Sacoglottis	Humiriaceae	3	0.295567	0	0	117.45
Sterculia	Sterculiaceae	3	0.295567	0	0	117.45
Manilkara	Sapotaceae	2	0.197044	0	0	78.3
Abarema	Fabaceae	2	0.197044	0	0	78.3
Albizia	Fabaceae	2	0.197044	0	0	78.3
Anaueria	Lauraceae	2	0.197044	0	0	78.3
Aniba	Lauraceae	2	0.197044	0	0	78.3
Anthodiscus	Caryocaraceae	2	0.197044	0	0	78.3
Byrsonima	Malpighiaceae	2	0.197044	0	0	78.3
Chrysophyllum	Sapotaceae	2	0.197044	2	2.29885	78.3
Composneura	Myristicaceae	2	0.197044	0	0	78.3
Couma	Apocynaceae	2	0.197044	0	0	78.3
Crepidospermum	Burseraceae	2	0.197044	0	0	78.3
Dendropanax	Araliaceae	2	0.197044	0	0	78.3
Duguetia	Annonaceae	2	0.197044	0	0	78.3
Huberodendron	Bombacaceae	2	0.197044	0	0	78.3
Maprounea	Euphorbiaceae	2	0.197044	0	0	78.3
Memora	Bignoniaceae	2	0.197044	0	0	78.3
Parinari	Chrysobalanaceae	2	0.197044	0	0	78.3
Persea	Lauraceae	2	0.197044	0	0	78.3
Pleurothyrium	Lauraceae	2	0.197044	0	0	78.3
Pseudolmedia	Moraceae	2	0.197044	0	0	78.3
indet. sp. 1	Quiinaceae	2	0.197044	0	0	78.3
indet . sp. 2	Quiinaceae	2	0.197044	0	0	78.3
Allantoma	Lecythidaceae	0	0	1	1.14943	0
Amaioua	Rubiaceae	0	0	2	2.29885	0
Caryocar	Caryocaraceae	0	0	1	1.14943	0
Gyranthera	Malvaceae	0	0	1	1.14943	0
Parahancornia	Apocynaceae	0	0	1	1.14943	0
		1015	100	87	100	39737.3
